# Supplementary material for: Development of a Derivatization Reagent with a 2-Nitrophenylsulfonyl Moiety for UHPLC-HRMS/MS and Its Application to Detect Amino Acids Including Taurine
Source: MDPI journal article supplement (doi:10.3390/molecules26123498), 2021-06-08
Supplement: s1 [file s1]

**Development of a Derivatization Reagent with a  
2-Nitrophenylsulfonyl Moiety for UHPLC-HRMS/MS and Its  
Application to Detect Amino Acids Including Taurine**

Shusuke Uekusa <sup>1,2</sup>, Mayu Onozato <sup>1</sup>, Maho Umino <sup>1</sup>, Tatsuya Sakamoto <sup>1</sup>, Hideaki  
Ichiba <sup>1</sup>, Kenji Okoshi <sup>3</sup>, Takeshi Fukushima <sup>1\*</sup>

<sup>1</sup> Department of Analytical Chemistry, Faculty of Pharmaceutical Sciences, Toho  
University, Chiba, Japan

<sup>2</sup> Department of Clinical Pharmacy, Faculty of Pharmaceutical Sciences, Toho  
University, Chiba, Japan

<sup>3</sup> Department of Environmental Science, Faculty of Science, Toho University, Chiba,  
Japan.

**Corresponding author:** Takeshi Fukushima PhD

Department of Analytical Chemistry, Faculty of Pharmaceutical Sciences, Toho  
University

Miyama 2-2-1, Funabashi, Chiba 274-8510, Japan

Phone: +81-47-472-1504; Fax: +81-47-472-1504

E-mail: [t-fukushima@phar.toho-u.ac.jp](mailto:t-fukushima@phar.toho-u.ac.jp)

## Contents

|            |                                                                                                                                                                                          |                     |
|------------|------------------------------------------------------------------------------------------------------------------------------------------------------------------------------------------|---------------------|
| <b>1</b>   | <b>Chemicals and reagents</b>                                                                                                                                                            | <b>..... Page 5</b> |
| <b>2</b>   | <b>LC-time of flight (TOF)-mass spectrometry</b>                                                                                                                                         | <b>..... Page 5</b> |
| <b>2.1</b> | <b>Comparison of retention times of Ns-MOK-<math>\beta</math>-Pro-OSu and Ns-MOK-Pro-OSu</b>                                                                                             | <b>..... Page 5</b> |
| <b>2.2</b> | <b>Time-course study on derivatization of amino acids with Ns-MOK-Pro-OSu and Ns-MOK-<math>\beta</math>-Pro-OSu</b>                                                                      | <b>..... Page 6</b> |
| <b>3</b>   | <b>Measurement conditions of UHPLC-high-resolution mass spectrometry (UHPLC-HRMS: Vanquish UHPLC system and Q-Exactive<sup>TM</sup>)</b>                                                 | <b>..... Page 6</b> |
| <b>3.1</b> | <b>Instrumentation</b>                                                                                                                                                                   | <b>..... Page 6</b> |
| <b>3.2</b> | <b>Electrospray ionization (ESI)</b>                                                                                                                                                     | <b>..... Page 7</b> |
| <b>3.3</b> | <b>Parameters of full MS-data dependent MS<sup>2</sup> (ddMS<sup>2</sup>) mode</b>                                                                                                       | <b>..... Page 7</b> |
| <b>3.4</b> | <b>Parameters of parallel reaction monitoring (PRM) mode</b>                                                                                                                             | <b>..... Page 8</b> |
| <b>4</b>   | <b>NMR measurements</b>                                                                                                                                                                  | <b>..... Page 8</b> |
| <b>5</b>   | <b>Preparation of 2,5-dioxopyrrolidin-1-yl 1-(4-(((2-nitrophenyl)sulfonyl)oxy)-6-(3-oxomorpholino)quinoline-2-carbonyl)pyrrolidine-3-carboxylate (Ns-MOK-<math>\beta</math>-Pro-OSu)</b> | <b>..... Page 8</b> |
| <b>5.1</b> | <b>1-(4-hydroxy-6-(3-oxomorpholino)quinoline-2-carbonyl)pyrrolidine-3-carboxylic acid (1)</b>                                                                                            | <b>..... Page 9</b> |

|            |                                                                                                                                                                            |                      |
|------------|----------------------------------------------------------------------------------------------------------------------------------------------------------------------------|----------------------|
| <b>5.2</b> | <b>1-(4-(((2-nitrophenyl)sulfonyl)oxy)-6-(3-oxomorpholino)quinoline-2-carbonyl) pyrrolidine-3-carboxylic acid (2)</b>                                                      | <b>..... Page 10</b> |
| <b>5.3</b> | <b>2,5-dioxopyrrolidin-1-yl 1-(4-(((2-nitrophenyl)sulfonyl)oxy)-6-(3-oxomorpholino)quinoline-2-carbonyl)pyrrolidine-3-carboxylate (Ns-MOK-β-Pro-OSu) (3)</b>               | <b>..... Page 10</b> |
| <b>6</b>   | <b>Optical rotation measurements of Ns-MOK-(<i>R</i>)- or (<i>S</i>)-Pro-OSu</b>                                                                                           | <b>..... Page 11</b> |
| <b>7</b>   | <b>Supporting Figures</b>                                                                                                                                                  |                      |
| <b>7.1</b> | <b>FIGURE S1 Chromatograms of Ns-MOK-(<i>S</i>)-Pro-OSu (a) and Ns-MOK-(<i>S</i>)-β-Pro-OSu (b) obtained using LC-TOF-MS</b>                                               | <b>..... Page 13</b> |
| <b>7.2</b> | <b>FIGURE S2 Calibration curves of amino acid derivatives: (a) Tau, (b) Val, (c) Gln, (d) Glu, and (e) Arg</b>                                                             | <b>..... Page 14</b> |
| <b>8</b>   | <b>Supporting Tables</b>                                                                                                                                                   |                      |
| <b>8.1</b> | <b>Table S1 Main fragmentation of Val derivatives (C<sub>30</sub>H<sub>31</sub>N<sub>5</sub>O<sub>11</sub>S, 669.1740) as a function of NCE (ESI (+) mode)</b>             | <b>..... Page 15</b> |
| <b>8.2</b> | <b>Table S2 Main fragmentation of Glu derivatives (C<sub>30</sub>H<sub>29</sub>N<sub>5</sub>O<sub>13</sub>S, 699.1482) as a function of NCE (ESI (+) mode)</b>             | <b>..... Page 15</b> |
| <b>8.3</b> | <b>Table S3 Main fragmentation of Gln derivatives (C<sub>30</sub>H<sub>30</sub>N<sub>6</sub>O<sub>12</sub>S, 698.1642) as a function of NCE (ESI (+) mode)</b>             | <b>..... Page 16</b> |
| <b>8.4</b> | <b>Table S4 Main fragmentation of Arg derivatives (C<sub>31</sub>H<sub>34</sub>N<sub>8</sub>O<sub>11</sub>S, 726.2067) as a function of NCE (ESI (+) mode)</b>             | <b>..... Page 16</b> |
| <b>8.5</b> | <b>Table S5 Main fragmentation of Tau derivatives (C<sub>27</sub>H<sub>27</sub>N<sub>5</sub>O<sub>12</sub>S<sub>2</sub>, 677.1097) as a function of NCE (ESI (+) mode)</b> | <b>..... Page 17</b> |
| <b>8.6</b> | <b>Table S6 Main fragmentation of Val derivatives (C<sub>30</sub>H<sub>31</sub>N<sub>5</sub>O<sub>11</sub>S,</b>                                                           |                      |

|      |                                                                                                                                                                                   |               |
|------|-----------------------------------------------------------------------------------------------------------------------------------------------------------------------------------|---------------|
|      | 669.1740) as a function of NCE (ESI (-) mode)                                                                                                                                     | ..... Page 17 |
| 8.7  | Table S7 Main fragmentation of Glu derivatives (C <sub>30</sub> H <sub>29</sub> N <sub>5</sub> O <sub>13</sub> S,<br>699.1482) as a function of NCE (ESI (-) mode)                | ..... Page 18 |
| 8.8  | Table S8 Main fragmentation of Gln derivatives (C <sub>30</sub> H <sub>30</sub> N <sub>6</sub> O <sub>12</sub> S,<br>698.1642) as a function of NCE (ESI (-) mode)                | ..... Page 18 |
| 8.9  | Table S9 Main fragmentation of Arg derivatives (C <sub>31</sub> H <sub>34</sub> N <sub>8</sub> O <sub>11</sub> S,<br>726.2067) as a function of NCE (ESI (-) mode)                | ..... Page 19 |
| 8.10 | Table S10 Main fragmentation of Tau derivatives (C <sub>27</sub> H <sub>27</sub> N <sub>5</sub> O <sub>12</sub> S <sub>2</sub> ,<br>677.1097) as a function of NCE (ESI (-) mode) | ..... Page 19 |
| 8.11 | Table S11 Precision of Tau/IS ratio                                                                                                                                               | ..... Page 20 |
| 8.12 | Table S12 Precision of Val/IS ratio                                                                                                                                               | ..... Page 20 |
| 8.13 | Table S13 Precision of Gln/IS ratio                                                                                                                                               | ..... Page 20 |
| 8.14 | Table S14 Precision of Glu/IS ratio                                                                                                                                               | ..... Page 20 |
| 8.15 | Table S15 Precision of Arg/IS ratio                                                                                                                                               | ..... Page 21 |
| 8.16 | Table S16 Tau content in bivalve                                                                                                                                                  | ..... Page 21 |
| 8.17 | Table S17 Val content in bivalve                                                                                                                                                  | ..... Page 22 |
| 8.18 | Table S18 Gln content in bivalve                                                                                                                                                  | ..... Page 23 |
| 8.19 | Table S19 Glu content in bivalve                                                                                                                                                  | ..... Page 24 |
| 8.20 | Table S20 Arg content in bivalve                                                                                                                                                  | ..... Page 25 |

## **1 Chemicals and reagents**

(*S*)- and (*R*)-Pyrrolidine-3-carboxylic acid ( $\beta$ -proline) were purchased from Sigma-Aldrich Co., Ltd. (St. Louis, MO, USA). Arginine (Arg), glutamine (Gln), glutamic acid (Glu), taurine (Tau), valine (Val), 4-(3-oxomorpholino)aniline, and 4-dimethylaminopyridine (DMAP) were purchased from Tokyo Chemical Industries Co., Ltd. (Tokyo, Japan). 1-(3-dimethylaminopropyl)-3-ethylcarbodiimide hydrochloride (EDC), diphenyl ether, diethyl acetylenedicarboxylate, LC-MS-grade CH<sub>3</sub>OH, HPLC-grade acetic acid, formic acid, and APDSTAG<sup>®</sup> Wako Amino Acids Internal Standard Mixture Solution were purchased from FUJIFILM Wako Pure Chemical Corporation (Osaka, Japan). LCMS-grade acetonitrile and chloroform were purchased from Kanto Chemical Co., Inc. (Tokyo, Japan).

## **2 LC-time of flight (TOF)-mass spectrometry**

The LC-TOF-MS equipment (JMS-T100LP, JEOL, Tokyo, Japan) with an intelligent HPLC system, M1000 (Agilent Technologies, Inc., Santa Clara, CA), was used for confirming each structure.

### **2.1 Comparison of retention times of Ns-MOK- $\beta$ -Pro-OSu and Ns-MOK-Pro-OSu**

The retention times of Ns-MOK- $\beta$ -Pro-OSu and Ns-MOK-Pro-OSu were determined using the LC-TOF-MS equipment. The separation column used was InertSustain<sup>®</sup> C18 (3  $\mu$ m, 2.1 $\times$ 100 mm) (GL Sciences Inc., Tokyo, Japan) maintained at 40°C. The mobile phases were 0.05% formic acid in [H<sub>2</sub>O/ CH<sub>3</sub>CN (4/1, v/v)] (A) and 0.05% formic acid in [H<sub>2</sub>O/ CH<sub>3</sub>CN (1/4, v/v)] (B), and eluted at 0.2 mL/min according to the following time program: 0–5 min; B% = 30, 5–40 min; B% = from 30 to 100, 40–

48 min; B% = 100, 48.0-48.1 min; B% = from 100 to 30, 48.1-56 min; B% = 30. In the MS system, the ion source was electron spray ionization (ESI) (+), and the desolvation chamber and orifice temperatures were 250 and 80°C, respectively. The voltages of orifices 1 and 2 were 50 and 5 V, respectively, and the peak-to-peak and needle voltages were 500 and 2500 V, respectively.

The prepared samples were dissolved in CH<sub>3</sub>CN (10 mM) and diluted 10-fold with a mobile phase (A). A 10 µL aliquot of the final solution was injected into the LC-TOF-MS equipment.

## **2.2 Time-course study on derivatization of amino acids with Ns-MOK-Pro-OSu and Ns-MOK-β-Pro-OSu.**

LC-TOF-MS was used for the time-course study of the derivatization of Tau, Arg, Glu, and Gln with Ns-MOK-β-Pro-OSu and Ns-MOK-Pro-OSu. The separation column used was InertSustain<sup>®</sup> C18 (3 µm, 2.1×100 mm) (GL Sciences Inc., Tokyo, Japan) maintained at 60°C. The mobile phases were 0.05% formic acid in [H<sub>2</sub>O/MeOH (9/1, v/v)] (A) and 0.05% formic acid in [H<sub>2</sub>O/MeOH (1/9, v/v)] (B), and eluted at 0.2 mL/min according to the following time program: 0–40 min; B% = 30–100, 40–50 min; B% = 100, 50-50.01 min; B% = 100–30, 50.01-60 min; B% = 30. The TOF-MS system used was the same as that described in **Section 2.1**. A 10 µL aliquot of the final solution was injected into the LC-TOF/MS equipment.

## **3 Measurement conditions of UHPLC-high-resolution mass spectrometry (UHPLC-HRMS: Vanquish UHPLC system and Q-Exactive<sup>TM</sup>)**

### **3.1 Instrumentation**

The instrument was calibrated before measurement using a ready-to-use calibration mixture. Briefly, a Vanquish UHPLC system equipped with an Acquity HSS T3 C18 column (1.8  $\mu\text{m}$ , 75  $\times$  2.1 mm) (Waters Corporation, Milford, MA) was used for chromatographic separation. A binary solvent system comprising mobile phases A (0.05% in [ $\text{H}_2\text{O}/\text{MeOH}$  (9/1, v/v)]) and B (0.05% in [ $\text{H}_2\text{O}/\text{MeOH}$  (1/9, v/v)]) was used at a constant flow rate of 0.4 mL/min at 45°C. The gradient elution was then performed using the following solvent proportions: A: 0–5 min; from 30 to 35, 5.0–5.1 min; 35% to 65%, 5.1–10 min; 65%, 10.0–10.1 min; from 65% to 100%, 10.1–13.0 min; 100%, 13.0–13.1 min; from 100 to 30%, 13.1–16.0 min; B% = 30%. Then, 5.0  $\mu\text{L}$  of the filtered sample solution described above was injected into the UHPLC system.

Detection was performed on a Q-Exactive<sup>TM</sup> standalone bench-top Quadrupole-Orbitrap high-resolution mass spectrometer, which was preceded by heated electrospray ionization (HESI-II source).

### **3.2 Electrospray ionization (ESI)**

During ESI, the spray voltages were -2.50 kV and 3.50 kV for the negative and positive ion modes, respectively. The following conditions were common in both ionization modes: sheath gas, auxiliary gas, sweep gas flow rates of 50, 13, and 3 arbitrary units, capillary and auxiliary gas heater temperatures of 263 and 425°C, respectively, and S-lens RF level of 50.0.

### **3.3 Parameters of full MS-data dependent MS<sup>2</sup> (ddMS<sup>2</sup>) mode**

The parameters for “Full MS-ddMS<sup>2</sup>” were as follows: mass range ( $m/z$ ) from 350 to 2,000, resolution of 17,500, AGC target at 100,000, normalized collision energy

(NCE) stepped at 15, 30, and 45%, loop count at 5, isolation window at 1.6  $m/z$ , minimum AGC target at 5000, and dynamic exclusion at 15.0 s

### 3.4 Parameters of parallel reaction monitoring (PRM) mode

The parameters for “PRM” were as follows: inclusion list with  $C_{30}H_{31}N_5O_{11}S$  (Val and Val- $^{13}C_3$ ,  $^{15}N$  derivative),  $C_{30}H_{29}N_5O_{13}S$  (Glu and Glu- $^{13}C_3$ ,  $^{15}N$  derivative),  $C_{30}H_{30}N_6O_{12}S$  (Gln and Gln- $^{13}C_3$ ,  $^{15}N_2$  derivative),  $C_{31}H_{34}N_8O_{11}S$  (Arg and Arg- $^{15}N_4$  derivative), and  $C_{27}H_{27}N_5O_{12}S_2$  (Tau and Tau- $^{13}C_2$  derivative), resolution at 17,500, AGC target at 20,000, maximum IT at 100 ms, and isolation window at 0.5  $m/z$

## 4 NMR measurements

The prepared compounds were dissolved in DMSO- $D_6$  or  $CDCl_3$ , and the proton NMR ( $^1H$ -NMR) spectra of the prepared compounds were recorded on a JMS-ECS 400 spectrometer (400 MHz) (JEOL Ltd., Tokyo, Japan) using tetramethylsilane (TMS) as the internal standard. Chemical shifts are expressed as parts per million relative to TMS.

## 5 Preparation of 2,5-dioxopyrrolidin-1-yl 1-(4-(((2-nitrophenyl)sulfonyl)oxy)-6-(3-oxomorpholino)quinoline-2-carbonyl)pyrrolidine-3-carboxylate (Ns-MOK- $\beta$ -Pro-OSu)

We synthesized 2,5-dioxopyrrolidin-1-yl 4-(((2-nitrophenyl)sulfonyl)oxy)-6-(3-oxomorpholino)quinoline-2-carboxylate using the method reported earlier [1]. The reaction scheme was shown in **FIGURE 8**.



### 5.1 1-(4-hydroxy-6-(3-oxomorpholino)quinoline-2-carbonyl)pyrrolidine-3-carboxylic acid (1)

Crude 2,5-dioxopyrrolidin-1-yl 4-(((2-nitrophenyl)sulfonyl)oxy)-6-(3-oxomorpholino)quinoline-2-carboxylate (494.5 mg, 0.87 mmol) was dissolved in dehydrated CH<sub>3</sub>CN (5 mL), and then DMAP (210.1 mg, 1.7 mmol, 2.0 eq.) in CH<sub>3</sub>CN (2 mL) and (*R*)-(-)- or (*S*)-(+)-pyrrolidine-3-carboxylic (200.1 mg, 1.7 mmol, 2.0 eq. in H<sub>2</sub>O (2 mL) were added. The solution was stirred at room temperature for 2 h. The reaction mixture was evaporated under reduced pressure. The residue was dissolved in 0.2% CH<sub>3</sub>CO<sub>2</sub>H in H<sub>2</sub>O/CH<sub>3</sub>CN (95:5, 10 mL). The solution was acidified to pH 3–4 using 6 M HCl. The mixture was purified using preparative reversed-phase column chromatography (Yamazen Corporation ULTRA PACK, ODS-SM, 50 μm, 120 Å, Size A, 11 × 300 mm) with a mobile phase [(0.2% CH<sub>3</sub>CO<sub>2</sub>H in H<sub>2</sub>O/CH<sub>3</sub>CN (95:5))] flow using a pump module (C601 BÜCHI Labortechnik GmbH, Essen, Germany) at a flow rate of 0.4 mL/min. The target fraction was collected and evaporated under reduced pressure. Light yellow crystals of 1-(4-hydroxy-6-(3-oxomorpholino)quinoline-2-carbonyl)pyrrolidine-3-carboxylic acid [1] were obtained (124.3 mg, 0.32 mmol, 37.2%).

C<sub>19</sub>H<sub>19</sub>N<sub>3</sub>O<sub>6</sub>, theoretical exact mass: 385.1274, experimental (M+H)<sup>+</sup>: 386.2229

<sup>1</sup>H-NMR (400 MHz, Methanol-D<sub>4</sub>) δ 8.08–8.25 (1H, ArH), 7.60–7.88 (2H, ArH), 6.35–6.55 (1H, ArH), 4.23–4.35 (2H, COCH<sub>2</sub>O), 3.95–4.19 (2H, NCH<sub>2</sub>CH<sub>2</sub>O), 3.81–3.96 (2H, NCH<sub>2</sub>CH<sub>2</sub>O), 3.58–3.79 (2H, NCH<sub>2</sub>CH), 3.04–3.23 (1H, (CH<sub>2</sub>)<sub>2</sub>CHCO), 2.11–2.39 (2H, CH<sub>2</sub>CH<sub>2</sub>N), and 1.90–2.02 (2H, CH<sub>2</sub>CH<sub>2</sub>CH)

## 5.2 1-(4-(((2-nitrophenyl)sulfonyl)oxy)-6-(3-oxomorpholino)quinoline-2-carbonyl)pyrrolidine-3-carboxylic acid (2)

Subsequently, (1) was dissolved in H<sub>2</sub>O (10 mL) and NaHCO<sub>3</sub> (271.3 mg, 3.2 mmol, 10.0 eq. It was then cooled over ice and a solution of 4-nitrobenzenesulfonyl chloride (282.9, 1.3 mmol, 4.0 eq. in acetone (5 mL) was added dropwise, and the mixture was stirred at room temperature for 2 h. The reaction mixture was then transferred to saturated NaHCO<sub>3</sub> (100 mL) and AcOEt (100 mL) in a separating funnel. The aqueous layer was acidified to pH 3 using 6 M HCl. The mixture was extracted with CHCl<sub>3</sub> (100 mL ×3) in a separating funnel. The organic layer was dried over Na<sub>2</sub>SO<sub>4</sub> after washing with brine (100 mL). The solvent was evaporated under reduced pressure. Crude 1-(4-(((2-nitrophenyl)sulfonyl)oxy)-6-(3-oxomorpholino)quinoline-2-carbonyl)pyrrolidine-3-carboxylic acid (2) was obtained as white/light yellow crystals (146.1 mg, 0.26 mmol, 79.3%).

C<sub>25</sub>H<sub>22</sub>N<sub>4</sub>O<sub>10</sub>S, theoretical exact mass: 570.1057, experimental (M+H)<sup>+</sup>: 571.1267

<sup>1</sup>H-NMR (400 MHz, Methanol-D<sub>4</sub>) δ 7.60-8.31 (8H, ArH), 4.27–4.33 (2H, COCH<sub>2</sub>O), 3.64–4.19 (8H, NCH<sub>2</sub>CH<sub>2</sub>O, NCH<sub>2</sub>CH<sub>2</sub>O, NCH<sub>2</sub>CH, CH<sub>2</sub>CH<sub>2</sub>N), 3.15–3.26 (1H, (CH<sub>2</sub>)<sub>2</sub>CHCO), and 2.11–2.39 (2H, CH<sub>2</sub>CH<sub>2</sub>CH)

## 5.3 2,5-dioxopyrrolidin-1-yl 1-(4-(((2-nitrophenyl)sulfonyl)oxy)-6-(3-oxomorpholino)quinoline-2-carbonyl)pyrrolidine-3-carboxylate (Ns-MOK-β-Pro-OSu) (3)

First, (2) was dissolved in dehydrated CHCl<sub>3</sub> (10 mL); NHS (115.0 mg, 1.0 mmol, 4.0 equiv.) and EDC (191.7 mg, 1.0 mmol, 4.0 equiv.) in dehydrated CH<sub>3</sub>CN (10 mL) were added. The solution was stirred at room temperature for 2 h. The reaction mixture was extracted with CHCl<sub>3</sub> (100 mL) and the organic layer was washed with

saturated NaHCO<sub>3</sub> (100 mL), followed by 0.2 M HCl (100 mL) and brine (100 mL) in a separating funnel.

The organic layer was dried over Na<sub>2</sub>SO<sub>4</sub>, and the solvent was evaporated under reduced pressure. The residue was dissolved in H<sub>2</sub>O/CH<sub>3</sub>CN (2:1, 5 mL). The mixture was purified using preparative reversed-phase column chromatography (Yamazen Corporation ULTRA PACK, ODS-SM, 50 μm, 120 Å, Size A, 11 × 300 mm) with a mobile phase (H<sub>2</sub>O/CH<sub>3</sub>CN (2:1)) flow using a pump module (C601, BÜCHI Labortechnik GmbH, Essen, Germany) at a flow rate of 0.6 mL/min. The target fraction was collected and extracted using CHCl<sub>3</sub> (100 mL). The organic layer was washed with saturated NaHCO<sub>3</sub> (100 mL), followed by 0.2 M HCl (100 mL) and brine (100 mL) in a separating funnel. The organic layer was dried over Na<sub>2</sub>SO<sub>4</sub>, and the solvent was evaporated under reduced pressure. White crystals of 2,5-dioxopyrrolidin-1-yl 1-(4-(((2-nitrophenyl)sulfonyl)oxy)-6-(3-oxomorpholino)quinoline-2-carbonyl)pyrrolidine-3-carboxylate (Ns-MOK-β-Pro-OSu) (3) were obtained (57.0 mg, 0.085 mmol, 32.7%). C<sub>29</sub>H<sub>25</sub>N<sub>5</sub>O<sub>12</sub>S, theoretical exact mass: 667.1220, experimental (M+H)<sup>+</sup>: 668.0740 <sup>1</sup>H-NMR (400 MHz, Chloroform-D) δ 8.08–8.17 (3H, ArH), 7.94–8.03 (2H, ArH), 7.84–7.91 (2H, ArH), 7.72–7.82 (1H, ArH), 4.32–4.49 (3H, COCH<sub>2</sub>O, NCH<sub>2</sub>CH), 4.04–4.23 (4H, NCH<sub>2</sub>CH<sub>2</sub>O), 3.91–3.98 (2H, CH<sub>2</sub>CH<sub>2</sub>N), 3.44–3.55 (1H, NCH<sub>2</sub>CH), 2.72–3.00 (5H, COCH<sub>2</sub>CH<sub>2</sub>CO, (CH<sub>2</sub>)<sub>2</sub>CHCO), and 2.27–2.67 (2H, CH<sub>2</sub>CH<sub>2</sub>CH).

## 6 Optical rotation measurements of Ns-MOK-(*R*)- or (*S*)-Pro-OSu

The optical rotation of each optically active isomer of Ns-MOK-(*R*)- or (*S*)-β-Pro-OSu was measured using a polarimeter (P-2200, Jasco Corporation, Tokyo, Japan) with a 100-mm-long glass cell. The (*R*)- and (*S*)-enantiomers were dissolved in CHCl<sub>3</sub> at concentrations of 0.445 and 0.650% (w/v), respectively. The specific rotations using

sodium D-line (589 nm) irradiation at room temperature were measured.

Their specific rotations  $[\alpha]_{\text{D}}$  showed opposite polarities ( $-27.7^{\circ}$  and  $+13.9^{\circ}$ , respectively).

## 7 Supporting Figures

### 7.1

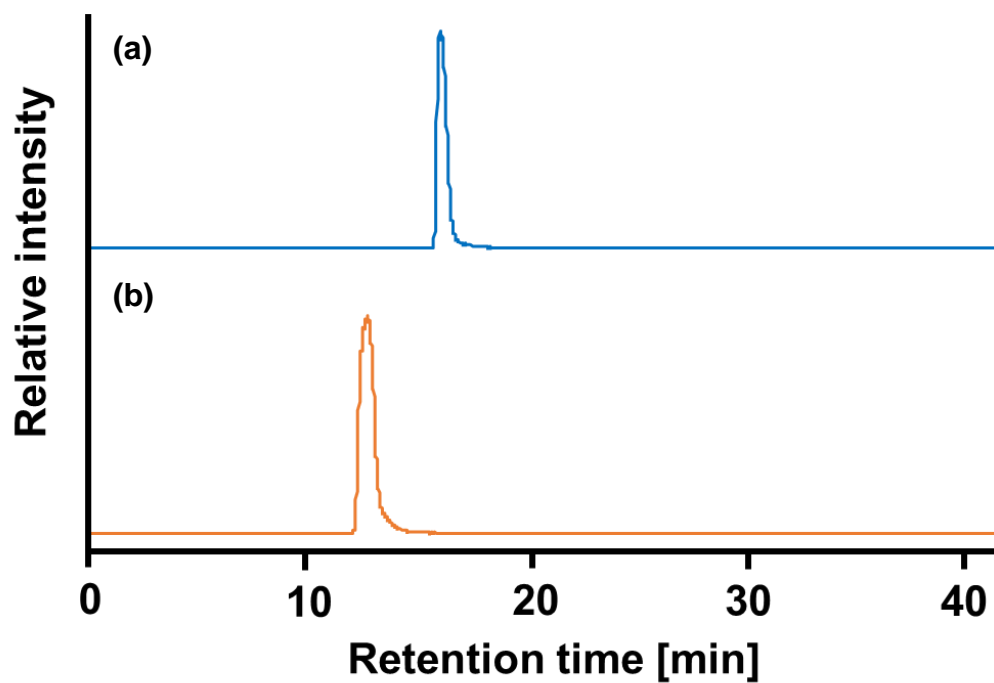

**FIGURE S1** Chromatograms of Ns-MOK-(*S*)-Pro-OSu (a) and Ns-MOK-(*S*)- $\beta$ -Pro-OSu (b) obtained using LC-TOF-MS.

## 7.2

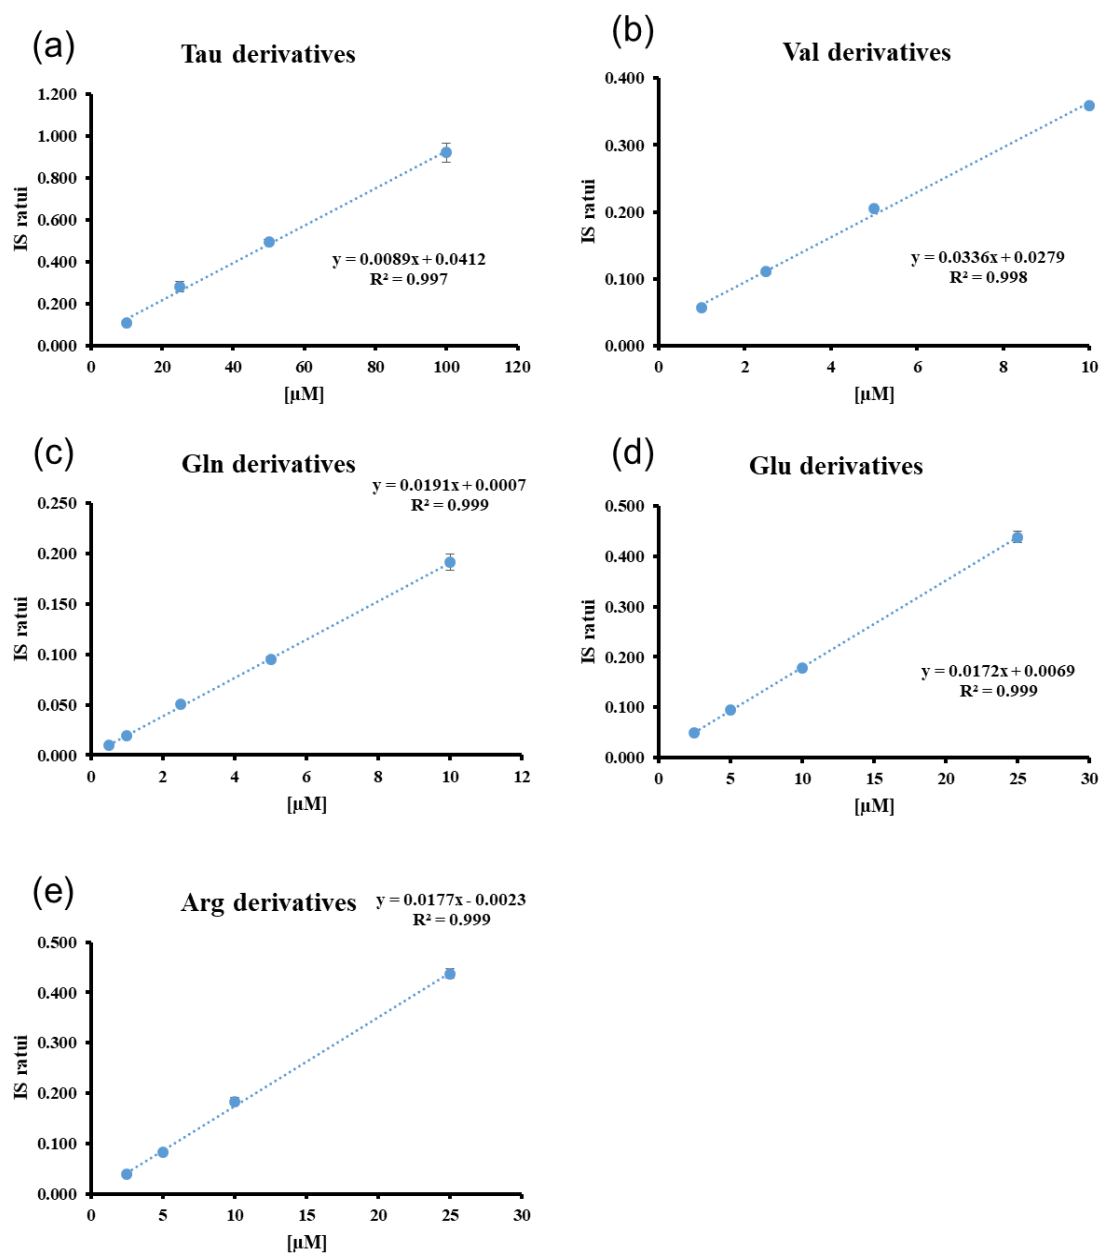

**FIGURE S2 Calibration curves of amino acid derivatives: (a) Tau, (b) Val, (c) Gln, (d) Glu, and (e) Arg**

## 8 Supporting Tables

### 8.1

**Table S1** Main fragmentation of Val derivatives ( $C_{30}H_{31}N_5O_{11}S$ , 669.1740)  
as a function of NCE (ESI (+) mode)

| Fragment ion | NCE   |
|--------------|-------|
| 482.1424     | 10-20 |
| 259.0711     | 30-60 |
| 213.1232     | 40-90 |
| 96.0443      | 40-90 |
| 70.0651      | 40-90 |

### 8.2

**Table S2** Main fragmentation of Glu derivatives ( $C_{30}H_{29}N_5O_{13}S$ , 699.1482)  
as a function of NCE (ESI (+) mode)

| Fragment ion | NCE   |
|--------------|-------|
| 312.1347     | 30    |
| 259.0711     | 40-60 |
| 243.0972     | 30    |
| 159.9981     | 30    |
| 96.0444      | 60-90 |
| 80.9480      | 30    |
| 68.0494      | 70-90 |

### 8.3

**Table S3** Main fragmentation of Gln derivatives (C<sub>30</sub>H<sub>30</sub>N<sub>6</sub>O<sub>12</sub>S, 698.1642)

as a function of NCE (ESI (+) mode)

| Fragment ion | NCE   |
|--------------|-------|
| 259.0716     | 50-60 |
| 242.1134     | 30    |
| 147.0765     | 40    |
| 96.0445      | 40-90 |

### 8.4

**Table S4** Main fragmentation of Arg derivatives (C<sub>31</sub>H<sub>34</sub>N<sub>8</sub>O<sub>11</sub>S, 726.2067)

as a function of NCE (ESI (+) mode)

| Fragment ion | NCE   |
|--------------|-------|
| 270.1558     | 30-40 |
| 261.0869     | 60-80 |
| 201.0981     | 40-50 |
| 96.0444      | 50-90 |
| 70.0652      | 50-90 |



## 8.5

**Table S5** Main fragmentation of Tau derivatives (C<sub>27</sub>H<sub>27</sub>N<sub>5</sub>O<sub>12</sub>S<sub>2</sub>, 677.1097)

as a function of NCE (ESI (+) mode)

| Fragment ion | NCE   |
|--------------|-------|
| 312.1347     | 30    |
| 259.0711     | 30-80 |
| 221.0591     | 30-40 |
| 185.9852     | 40    |
| 96.0444      | 50-90 |
| 70.0651      | 60-90 |
| 68.0494      | 70-90 |

## 8.6

**Table S6** Main fragmentation of Val derivatives (C<sub>30</sub>H<sub>31</sub>N<sub>5</sub>O<sub>11</sub>S, 669.1740)

as a function of NCE (ESI (-) mode)

| Fragment ion | NCE   |
|--------------|-------|
| 243.0778     | 60-70 |
| 201.9817     | 10-50 |
| 185.0718     | 80    |
| 96.9698      | 10-80 |
| 79.9592      | 10-80 |

## 8.7

**Table S7**            **Main fragmentation of Glu derivatives (C<sub>30</sub>H<sub>29</sub>N<sub>5</sub>O<sub>13</sub>S, 699.1482)**

**as a function of NCE (ESI (-) mode)**

| Fragment ion | NCE   |
|--------------|-------|
| 243.0775     | 50-60 |
| 201.9822     | 10-50 |
| 185.0719     | 80    |
| 163.8407     | 10    |
| 129.8716     | 30-70 |
| 92.9272      | 10    |
| 78.9573      | 60-90 |

## 8.8

**Table S8**            **Main fragmentation of Gln derivatives (C<sub>30</sub>H<sub>30</sub>N<sub>6</sub>O<sub>12</sub>S, 698.1642)**

**as a function of NCE (ESI (-) mode)**

| Fragment ion | NCE (%) |
|--------------|---------|
| 291.8399     | 10      |
| 259.0716     | 50-60   |
| 201.9815     | 20-30   |
| 147.0767     | 40      |
| 127.8736     | 30      |
| 96.0445      | 40-60   |
| 79.9574      | 80-90   |

## 8.9

**Table S9**      **Main fragmentation of Arg derivatives (C<sub>31</sub>H<sub>34</sub>N<sub>8</sub>O<sub>11</sub>S, 726.2067)**

**as a function of NCE (ESI (-) mode)**

| Fragment ion | NCE   |
|--------------|-------|
| 391.2853     | 10    |
| 268.8007     | 20    |
| 243.0774     | 60-70 |
| 201.9810     | 20-40 |
| 185.0726     | 80    |
| 92.9283      | 10-90 |
| 78.9590      | 80-90 |

## 8.10

**Table S10**      **Main fragmentation of Tau derivatives (C<sub>27</sub>H<sub>27</sub>N<sub>5</sub>O<sub>12</sub>S<sub>2</sub>, 677.1097)**

**as a function of NCE (ESI (-) mode)**

| Fragment ion | NCE   |
|--------------|-------|
| 219.0445     | 30-60 |
| 201.9812     | 20    |
| 163.8404     | 10    |
| 149.9865     | 30    |
| 124.0073     | 60-70 |
| 92.9281      | 10    |
| 79.9574      | 20-90 |

### 8.11

**Table S11 Precision of Tau/IS ratio**

| <b>Tau<br/>(<math>\mu</math>M)</b> | <b>100</b>     | <b>50</b>      | <b>25</b>      | <b>10</b>      |
|------------------------------------|----------------|----------------|----------------|----------------|
| <b>mean</b>                        | <b>0.921</b>   | <b>0.496</b>   | <b>0.281</b>   | <b>0.109</b>   |
| <b>sd</b>                          | <b>0.046</b>   | <b>0.011</b>   | <b>0.025</b>   | <b>0.008</b>   |
| <b>CV%</b>                         | <b>4.94143</b> | <b>2.12266</b> | <b>8.75605</b> | <b>7.29962</b> |

### 8.12

**Table S12 Precision of Val/IS ratio**

| <b>Val (<math>\mu</math>M)</b> | <b>10</b>    | <b>5</b>     | <b>2.5</b>   | <b>1</b>     |
|--------------------------------|--------------|--------------|--------------|--------------|
| <b>mean</b>                    | <b>0.360</b> | <b>0.205</b> | <b>0.111</b> | <b>0.057</b> |
| <b>sd</b>                      | <b>0.002</b> | <b>0.002</b> | <b>0.004</b> | <b>0.001</b> |
| <b>CV%</b>                     | <b>0.680</b> | <b>1.047</b> | <b>3.524</b> | <b>1.945</b> |

### 8.13

**Table S13 Precision of Gln/IS ratio**

| <b>Gln (<math>\mu</math>M)</b> | <b>10</b>    | <b>5</b>     | <b>2.5</b>   | <b>1</b>     | <b>0.5</b>                             |
|--------------------------------|--------------|--------------|--------------|--------------|----------------------------------------|
| <b>mean</b>                    | <b>0.191</b> | <b>0.095</b> | <b>0.051</b> | <b>0.019</b> | <b>0.010</b>                           |
| <b>sd</b>                      | <b>0.008</b> | <b>0.002</b> | <b>0.002</b> | <b>0.001</b> | <b><math>2.3 \times 10^{-4}</math></b> |
| <b>CV%</b>                     | <b>4.113</b> | <b>2.122</b> | <b>4.757</b> | <b>5.781</b> | <b>2.430</b>                           |

### 8.14

**Table S14 Precision of Glu/IS ratio**

| <b>Glu (<math>\mu</math>M)</b> | <b>25</b>    | <b>10</b>    | <b>5</b>     | <b>2.5</b>   |
|--------------------------------|--------------|--------------|--------------|--------------|
| <b>mean</b>                    | <b>0.438</b> | <b>0.177</b> | <b>0.095</b> | <b>0.050</b> |
| <b>sd</b>                      | <b>0.012</b> | <b>0.005</b> | <b>0.001</b> | <b>0.001</b> |
| <b>CV%</b>                     | <b>2.701</b> | <b>2.710</b> | <b>0.635</b> | <b>2.445</b> |

## 8.15

**Table S15** Precision of Arg/IS ratio

| Arg<br>( $\mu\text{M}$ ) | 25    | 10    | 5     | 2.5   |
|--------------------------|-------|-------|-------|-------|
| mean                     | 0.437 | 0.184 | 0.083 | 0.039 |
| sd                       | 0.009 | 0.007 | 0.002 | 0.003 |
| CV%                      | 2.121 | 4.046 | 2.281 | 7.331 |

## 8.16

**Table S16** Tau content in bivalve

| Sample No. | Tau IS ratio |       | Tau<br>Conc.(mM) | Weight of edible<br>portion (g) | Tau content per gram<br>of the edible portion<br>(mg) |
|------------|--------------|-------|------------------|---------------------------------|-------------------------------------------------------|
|            | mean         | sd    |                  |                                 |                                                       |
| No. 1      | 0.318        | 0.004 | 3.11             | 1.29                            | 3.90                                                  |
| No. 2      | 0.476        | 0.017 | 4.88             | 2.69                            | 6.11                                                  |
| No. 3      | 0.402        | 0.026 | 4.06             | 1.69                            | 5.08                                                  |
| No. 4      | 0.355        | 0.005 | 3.52             | 1.41                            | 4.41                                                  |
| No. 5      | 0.342        | 0.008 | 3.39             | 1.75                            | 4.24                                                  |
| No. 6      | 0.419        | 0.009 | 4.25             | 2.34                            | 5.32                                                  |
| No. 7      | 0.553        | 0.013 | 5.75             | 2.58                            | 7.20                                                  |
| No. 8      | 0.352        | 0.011 | 3.49             | 2.64                            | 4.37                                                  |
| No. 9      | 0.600        | 0.016 | 6.28             | 2.57                            | 7.86                                                  |
| No. 10     | 0.781        | 0.026 | 8.31             | 3.05                            | 10.40                                                 |
| No. 11     | 0.326        | 0.022 | 3.21             | 1.66                            | 4.01                                                  |
| No. 12     | 0.443        | 0.009 | 4.51             | 1.17                            | 5.65                                                  |
| No. 13     | 0.292        | 0.014 | 2.82             | 1.96                            | 3.53                                                  |
| No. 14     | 0.274        | 0.011 | 2.62             | 1.36                            | 3.28                                                  |
| No. 15     | 0.372        | 0.011 | 3.72             | 1.46                            | 4.66                                                  |

No. 1–5: Japanese littleneck clam from the intertidal zone in Mangoku-ura Laggon, No. 6–10: Japanese littleneck clam from the subtidal zone in Mangoku-ura Lagoon, and No. 11–15: Japanese littleneck clam from estuary of Udagawa in Matsukawa-ura Lagoon

## 8.17

**Table S17 Val content in bivalve**

| Sample No. | Val IS ratio |       | Val<br>Conc.(mM) | Weight of edible<br>portion (g) | Val content per gram<br>of the edible portion<br>(mg) |
|------------|--------------|-------|------------------|---------------------------------|-------------------------------------------------------|
|            | mean         | sd    |                  |                                 |                                                       |
| No. 1      | 0.075        | 0.002 | 0.14             | 1.29                            | 0.16                                                  |
| No. 2      | 0.113        | 0.001 | 0.25             | 2.69                            | 0.30                                                  |
| No. 3      | 0.097        | 0.003 | 0.21             | 1.69                            | 0.24                                                  |
| No. 4      | 0.081        | 0.003 | 0.16             | 1.41                            | 0.19                                                  |
| No. 5      | 0.088        | 0.002 | 0.18             | 1.75                            | 0.21                                                  |
| No. 6      | 0.114        | 0.002 | 0.26             | 2.34                            | 0.30                                                  |
| No. 7      | 0.145        | 0.003 | 0.35             | 2.58                            | 0.41                                                  |
| No. 8      | 0.090        | 0.007 | 0.19             | 2.64                            | 0.22                                                  |
| No. 9      | 0.136        | 0.001 | 0.32             | 2.57                            | 0.38                                                  |
| No. 10     | 0.175        | 0.004 | 0.44             | 3.05                            | 0.51                                                  |
| No. 11     | 0.093        | 0.005 | 0.19             | 1.66                            | 0.23                                                  |
| No. 12     | 0.120        | 0.004 | 0.28             | 1.17                            | 0.32                                                  |
| No. 13     | 0.094        | 0.003 | 0.20             | 1.96                            | 0.23                                                  |
| No. 14     | 0.080        | 0.001 | 0.16             | 1.36                            | 0.18                                                  |
| No. 15     | 0.109        | 0.005 | 0.24             | 1.46                            | 0.28                                                  |

No. 1–5: Japanese littleneck clam from the intertidal zone in Mangoku-ura Lagoon, No. 6–10: Japanese littleneck clam from the subtidal zone in Mangoku-ura Lagoon, and No. 11–15: Japanese littleneck clam from estuary of Udagawa in Matsukawa-ura Lagoon

## 8.18

**Table S18 Gln content in bivalve**

| Sample No. | Gln IS ratio |       | Gln<br>Conc.(mM) | Weight of edible<br>portion (g) | Gln content per gram<br>of the edible portion<br>(mg) |
|------------|--------------|-------|------------------|---------------------------------|-------------------------------------------------------|
|            | mean         | sd    |                  |                                 |                                                       |
| No. 1      | 0.021        | 0.001 | 0.11             | 1.29                            | 0.15                                                  |
| No. 2      | 0.051        | 0.011 | 0.26             | 2.69                            | 0.39                                                  |
| No. 3      | 0.021        | 0.001 | 0.11             | 1.69                            | 0.15                                                  |
| No. 4      | 0.020        | 0.001 | 0.10             | 1.41                            | 0.15                                                  |
| No. 5      | 0.024        | 0.003 | 0.12             | 1.75                            | 0.18                                                  |
| No. 6      | 0.027        | 0.001 | 0.14             | 2.34                            | 0.20                                                  |
| No. 7      | 0.045        | 0.002 | 0.23             | 2.58                            | 0.34                                                  |
| No. 8      | 0.019        | 0.002 | 0.09             | 2.64                            | 0.14                                                  |
| No. 9      | 0.046        | 0.001 | 0.24             | 2.57                            | 0.35                                                  |
| No. 10     | 0.060        | 0.006 | 0.31             | 3.05                            | 0.46                                                  |
| No. 11     | 0.011        | 0.000 | 0.05             | 1.66                            | 0.08                                                  |
| No. 12     | 0.010        | 0.002 | 0.05             | 1.17                            | 0.08                                                  |
| No. 13     | 0.013        | 0.000 | 0.06             | 1.96                            | 0.09                                                  |
| No. 14     | 0.017        | 0.001 | 0.09             | 1.36                            | 0.13                                                  |
| No. 15     | 0.016        | 0.002 | 0.08             | 1.46                            | 0.12                                                  |

No. 1–5: Japanese littleneck clam from the intertidal zone in Mangoku-ura Lagoon, No. 6–10: Japanese littleneck clam from the subtidal zone in Mangoku-ura Lagoon, and No. 11–15: Japanese littleneck clam from estuary of Udagawa in Matsukawa-ura Lagoon

## 8.19

**Table S19 Glu content in bivalve**

| Sample no. | Glu IS ratio |       | Glu<br>Conc.(mM) | Weight of edible<br>portion (g) | Glu content per gram<br>of the edible portion<br>(mg) |
|------------|--------------|-------|------------------|---------------------------------|-------------------------------------------------------|
|            | mean         | sd    |                  |                                 |                                                       |
| No. 1      | 0.079        | 0.006 | 0.42             | 1.29                            | 0.62                                                  |
| No. 2      | 0.151        | 0.002 | 0.84             | 2.69                            | 1.24                                                  |
| No. 3      | 0.110        | 0.005 | 0.60             | 1.69                            | 0.88                                                  |
| No. 4      | 0.107        | 0.005 | 0.58             | 1.41                            | 0.86                                                  |
| No. 5      | 0.099        | 0.004 | 0.54             | 1.75                            | 0.79                                                  |
| No. 6      | 0.151        | 0.020 | 0.84             | 2.34                            | 1.23                                                  |
| No. 7      | 0.188        | 0.004 | 1.05             | 2.58                            | 1.55                                                  |
| No. 8      | 0.134        | 0.003 | 0.74             | 2.64                            | 1.09                                                  |
| No. 9      | 0.204        | 0.007 | 1.15             | 2.57                            | 1.69                                                  |
| No. 10     | 0.296        | 0.010 | 1.68             | 3.05                            | 2.48                                                  |
| No. 11     | 0.110        | 0.008 | 0.60             | 1.66                            | 0.88                                                  |
| No. 12     | 0.174        | 0.020 | 0.97             | 1.17                            | 1.43                                                  |
| No. 13     | 0.096        | 0.009 | 0.52             | 1.96                            | 0.76                                                  |
| No. 14     | 0.085        | 0.004 | 0.46             | 1.36                            | 0.67                                                  |
| No. 15     | 0.149        | 0.002 | 0.82             | 1.46                            | 1.21                                                  |

No. 1–5: Japanese littleneck clam from the intertidal zone in Mangoku-ura, No. 6–10: Japanese littleneck clam from the subtidal zone in Mangoku-ura, and No. 11–15: Japanese littleneck clam from estuary of Udagawa in Matsukawa-ura Lagoon



## 8.20

**Table S20 Arg content in bivalve**

| Sample No. | Arg IS ratio |       | Arg<br>Conc.(mM) | Weight of edible<br>portion (g) | Arg content per gram<br>of the edible portion<br>(mg) |
|------------|--------------|-------|------------------|---------------------------------|-------------------------------------------------------|
|            | mean         | sd    |                  |                                 |                                                       |
| No. 1      | 0.044        | 0.002 | 0.26             | 1.29                            | 0.45                                                  |
| No. 2      | 0.089        | 0.006 | 0.51             | 2.69                            | 0.90                                                  |
| No. 3      | 0.038        | 0.006 | 0.23             | 1.69                            | 0.40                                                  |
| No. 4      | 0.047        | 0.002 | 0.28             | 1.41                            | 0.49                                                  |
| No. 5      | 0.056        | 0.006 | 0.33             | 1.75                            | 0.58                                                  |
| No. 6      | 0.065        | 0.005 | 0.38             | 2.34                            | 0.66                                                  |
| No. 7      | 0.110        | 0.003 | 0.64             | 2.58                            | 1.11                                                  |
| No. 8      | 0.059        | 0.004 | 0.35             | 2.64                            | 0.60                                                  |
| No. 9      | 0.102        | 0.006 | 0.59             | 2.57                            | 1.03                                                  |
| No. 10     | 0.148        | 0.018 | 0.85             | 3.05                            | 1.47                                                  |
| No. 11     | 0.038*       | 0.000 | 0.23             | 1.66                            | 0.40                                                  |
| No. 12     | 0.059        | 0.006 | 0.35             | 1.17                            | 0.60                                                  |
| No. 13     | 0.031*       | 0.005 | 0.19             | 1.96                            | 0.32                                                  |
| No. 14     | 0.031*       | 0.002 | 0.19             | 1.36                            | 0.33                                                  |
| No. 15     | 0.050        | 0.010 | 0.30             | 1.46                            | 0.51                                                  |

No. 1–5: Japanese littleneck clam from the intertidal zone in Mangoku-ura, No. 6–10: Japanese littleneck clam from the subtidal zone in Mangoku-ura, and No. 11–15: Japanese littleneck clam from estuary of Udagawa in Matsukawa-ura Lagoon

\* Values below the lower limit of the calibration curve. They are reference values, but they are calculated by extrapolating the calibration curve.

## References

1. Uekusa, S.; Onozato, M.; Sakamoto, T.; Umino, M.; Ichiba, H.; Fukushima, T. Fluorimetric Determination of the Enantiomers of Vigabatrin, an Antiepileptic Drug, by Reversed-Phase HPLC with a Novel Diastereomer Derivatisation Reagent. *Biomed. Chromatogr.* **2021**, *35*, e5060, doi:10.1002/bmc.5060.
